## Integrated $^{64}\text{Cu}$ therapy for the peritoneal dissemination of gastrointestinal cancer

Hiroaki Kurihara

**News on:** Yoshii, et al. Integrated treatment using intraperitoneal radioimmunotherapy and positron emission tomography-guided surgery with  $^{64}\text{Cu}$ -labeled cetuximab to treat early- and late-phase peritoneal dissemination in human gastrointestinal cancer xenografts. *Oncotarget*. 2018; 9:28935-28950. <https://doi.org/10.18632/oncotarget.25649>

Peritoneal dissemination is a frequent cause of death in patients with gastrointestinal cancers. It is difficult to treat with conventional therapeutics, particularly when it proceeds to a late phase. Hence, there is a strong need to develop new treatment strategies for peritoneal dissemination, to improve patient survival.

Recently, a Japanese team from the National Institute of Radiological Sciences (National Institutes for Quantum and Radiological Science and Technology), National Cancer Center Hospital East, and Nihon Medi-Physics Co., Ltd. published a study in the journal *Oncotarget* [1] to address this problem.

In this study, Dr. Yoshii and her colleagues developed a novel and invocative treatment strategy, called an “integrated  $^{64}\text{Cu}$  therapy” that used  $^{64}\text{Cu}$ -intraperitoneal radioimmunotherapy (ipRIT), alone or in combination with positron emission tomography (PET)-guided surgery to treat early- and late-phase peritoneal dissemination in mouse models. To achieve this new strategy, they focused on a theranostic agent, a  $^{64}\text{Cu}$ -labeled anti-epidermal growth factor receptor (EGFR) antibody cetuximab. Cetuximab is widely used in clinical practices for a large variety of cancers, because many malignant tumors show EGFR overexpression [2]. The significance of using  $^{64}\text{Cu}$ -labeled cetuximab is that this probe can be simultaneously used for both imaging and therapy.  $^{64}\text{Cu}$  is a radionuclide that uniquely emits positrons, which are used for PET imaging, and  $\beta^-$  particles, and Auger electrons, which are used for therapy [3, 4]. By using  $^{64}\text{Cu}$  as a radionuclide, the combination of ipRIT and PET-guided surgery can be realized with a single administration of  $^{64}\text{Cu}$ -labeled cetuximab.

In the study from Dr. Yoshii et al., the investigators tested the efficacy of ipRIT using  $^{64}\text{Cu}$ -labeled cetuximab in the first step and showed that this treatment effectively inhibited tumor growth and significantly prolonged survival with little toxicity, in mouse models with early-phase peritoneal dissemination of small lesions from gastrointestinal cancers. In the second step, they examined the feasibility of the combination use of  $^{64}\text{Cu}$ -ipRIT and PET-guided surgery using  $^{64}\text{Cu}$ -labeled cetuximab to treat late-phase peritoneal dissemination in mouse models. In this combination therapy,  $^{64}\text{Cu}$ -ipRIT is used

for downstaging by treating small lesions, and OpenPET-guided surgery is used for resecting large tumor masses. The authors demonstrated that the combination use of  $^{64}\text{Cu}$ -ipRIT and OpenPET-guided surgery effectively inhibited tumor growth and significantly prolonged survival without major toxicity in mouse models with late-phase peritoneal dissemination from gastrointestinal cancers.

Notably, to make PET-guided surgery feasible, the investigators utilized the world’s first open-typed PET system, called OpenPET, which they have developed [5]. In this system, the detectors are arranged to generate an open space for surgical procedures. Additionally, to achieve real-time PET imaging under surgery, the system equips a high-speed image reconstruction system. These outstanding technologies enable real-time PET imaging. In this proof-of-concept study with mice, a small-sized OpenPET system was used. Recently, a large-sized OpenPET system for human use has been also developed by their institute [6]. Therefore, OpenPET-guided surgery will be feasible in clinical settings in the future.

Thus far, several clinical PET studies have reported the utility of  $^{64}\text{Cu}$ -labeled agents for imaging in humans. Our group has reported that  $^{64}\text{Cu}$ -labeled trastuzumab PET is a potential noninvasive procedure for the serial identification of metastatic brain lesions in patients with HER2-positive breast cancer [7]. The study suggests that PET imaging with  $^{64}\text{Cu}$ -labeled antibody is a safe and feasible approach for outpatients. The use of  $^{64}\text{Cu}$ -labeled agents for therapy is also promising. Preclinical studies have reported the therapeutic effectiveness of  $^{64}\text{Cu}$ -labeled agents, including  $^{64}\text{Cu}$ -ATSM [8], and  $^{64}\text{Cu}$ -labeled antibodies [9]. Recently, a first-in-human study of radionuclide therapy with  $^{64}\text{CuCl}_2$  was performed by a group of Europe, in which they showed that the patient experienced a remarkable reduction in tumor volume without side effects [10]. These studies support the usefulness and feasibility of  $^{64}\text{Cu}$ -labeled agents in humans, for both imaging and therapeutic purposes. Based on these evidences,  $^{64}\text{Cu}$ -ipRIT and PET-guided surgery, proposed by Dr. Yoshii et al., are also worthwhile for further preclinical and clinical development.

Hiroaki Kurihara: Department of Diagnostic Radiology, National Cancer Center Hospital, Tokyo, Japan

**Correspondence to:** Hiroaki Kurihara, **email** hikuriha@ncc.go.jp

**Keywords:** Cu-64; EGFR; radiotherapy

**Received:** June 18, 2018

**Published:** July 27, 2018

## REFERENCES

1. Yoshii Y, et al. *Oncotarget*. 2018; 9:28935-28950.  
<https://doi.org/10.18632/oncotarget.25649>
2. Spano JP, et al. *Ann Oncol*. 2005; 16:102-108.
3. Lewis J, et al. *Proc Natl Acad Sci U S A*. 2001; 98:1206-1211.
4. Obata A, et al. *Nucl Med Biol*. 2005; 32:21-28.
5. Tashima H, et al. *Phys Med Biol*. 2016; 61:1795-1809.
6. Hirano Y, et al. *Phys Med Biol*. 2016; 61:4870-4889.
7. Kurihara H, et al. *Eur J Nucl Med Mol Imaging Res*. 2015; 5:8.
8. Yoshii Y, et al. *Transl Oncol*. 2018; 11:24-30.
9. Connett JM, et al. *Proc Natl Acad Sci U S A*. 1996; 93:6814-6818.
10. Capasso E, et al. *Eur J Nucl Med Mol Imaging*. 2015; S12.

**Copyright:** Kurihara et al. This is an open-access article distributed under the terms of the Creative Commons Attribution License 3.0 (CC BY 3.0), which permits unrestricted use, distribution, and reproduction in any medium, provided the original author and source are credited.
